# Supplementary material
Source: publisher figshare collection journal article supplement (https://acs.figshare.com/ndownloader/files/22034487)
Supplement: Supplementary file 1 [file 22034487]

## **Supporting Information**

### **Kendomycin cytotoxicity against bacterial, fungal and mammalian cells is due to cation chelation.**

Dale Tranter,<sup>†§</sup> Ireos Filipuzzi,<sup>‡§</sup> Thomas Lochmann,<sup>‡</sup> Britta Knapp,<sup>‡</sup> Juho Kellosalo,<sup>†</sup> David Estoppey,<sup>‡</sup>  
Dominik Pistorius,<sup>‡</sup> Axel Meissner,<sup>‡</sup> Ville O. Paavilainen,<sup>†\*</sup> and Dominic Hoepfner<sup>‡\*</sup>

<sup>†</sup>Institute of Biotechnology, University of Helsinki, Helsinki, 00014, Finland

<sup>‡</sup>Novartis Institutes for BioMedical Research, 4056 Basel, Switzerland

**Figure S1**

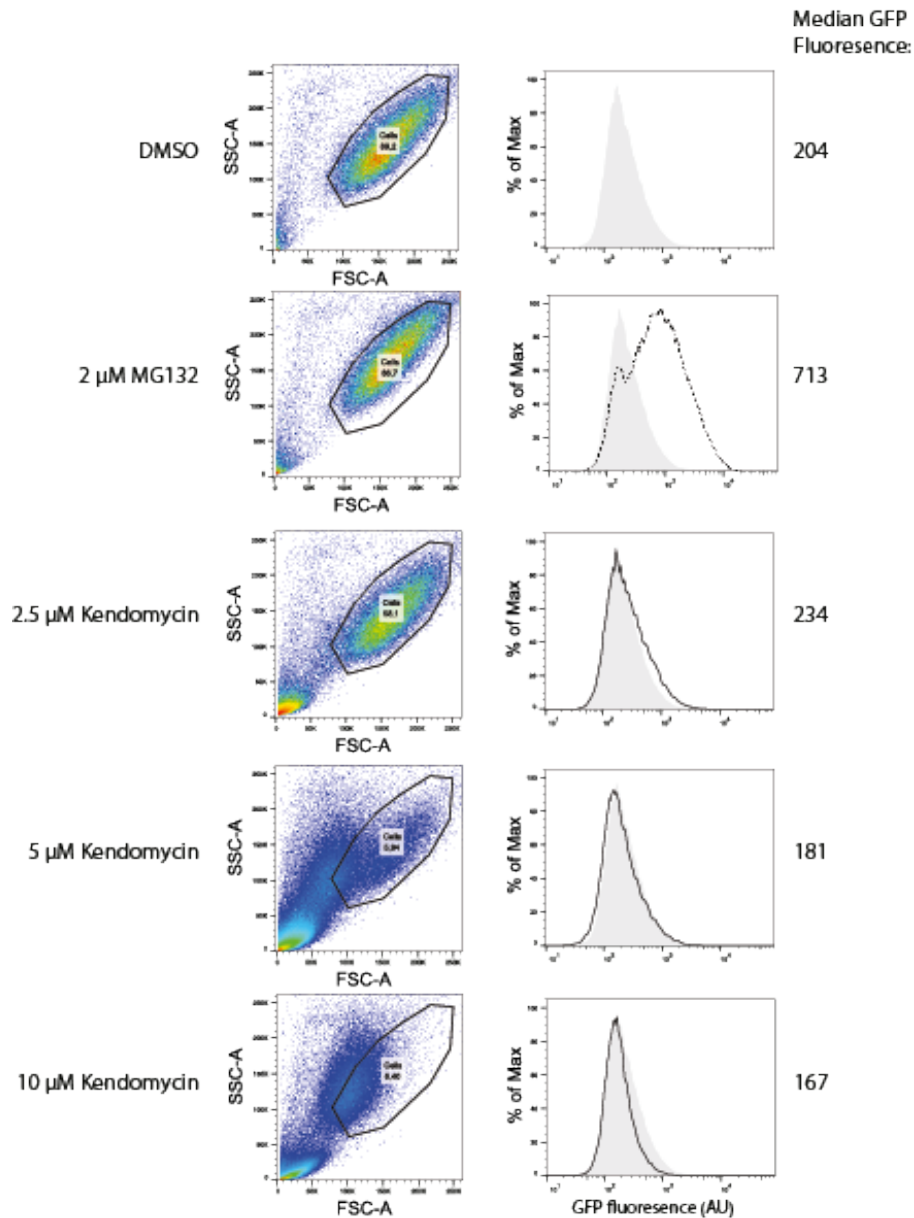

Effects of MG132 and Kendomycin on the cellular turnover of a destabilized Ub<sup>G76V</sup>-GFP reporter. The gene for a destabilized Ub<sup>G76V</sup>-GFP under an inducible TRE2 promoter was transduced into K562 cells with lentiviruses. 16h before the addition of the drugs, the expression of the Ub<sup>G76V</sup>-GFP was induced with 1  $\mu$ g/ml doxycyclin. The induced cells were treated for 4h with 0.1% DMSO, MG132 or Kendomycin and then analysed with BD LSRFortessa flow-cytometer (BD Biosciences). The left-hand panels show the light-scattering of the analyzed cells, while the right-hand panels show the GFP-fluorescence of the gated cell populations. In the right-hand panels the fluorescence of the DMSO-treated reference sample is shown in grey, while the fluorescence of the drug-treated cells is shown with a black line.

**Figure S2**

UV-Vis analysis of kendomycin interaction with various cations

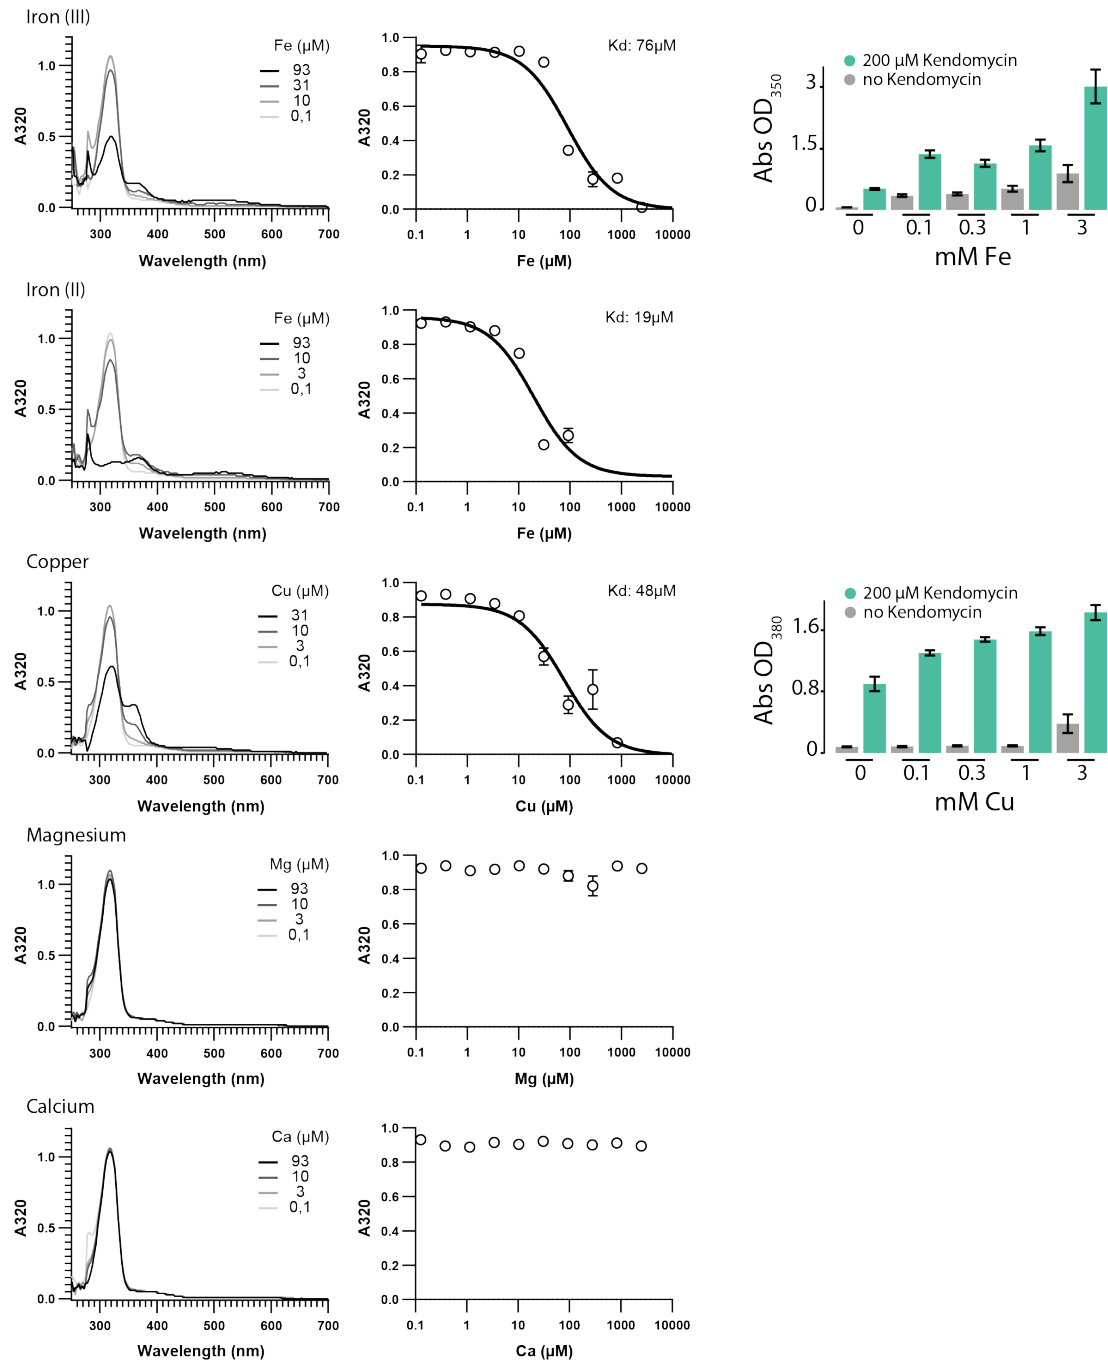

UV-Vis spectra of kendomycin in the presence of indicated concentrations of cations. A320 measurements (n=4) plotted against concentration and binding curve fitted to estimate  $K_{app}$ .

**Figure S3**

# <sup>1</sup>H-NMR analysis of kendomycin

| Atom# | H Shift | C Shift |
|-------|---------|---------|
| 1     | 4.193   | 77.019  |
| 2     | 1.6     | 37.27   |
| 3     | 3.393   | 75.834  |
| 4     | 1.754   | 39.843  |
| 5     | 3.386   | 78.095  |
| 6     | 0.723   | 13.624  |
| 8     | 0.772   | 7.498   |
| 9     | 1.123   | 32.813  |
| 9     | 1.362   | 32.813  |
| 10    | 1.252   | 35.618  |
| 10    | 1.076   | 35.618  |
| 11    | 2.239   | 33.074  |
| 12    | 0.768   | 23.171  |
| 13    | 4.466   | 129.538 |
| 14    |         | 132.242 |
| 15    | 1.488   | 20.224  |
| 16    | 1.528   | 45.68   |
| 16    | 2.024   | 45.68   |
| 17    | 1.786   | 26.159  |
| 18    | 0.826   | 20.267  |
| 19    | 1.394   | 39.51   |
| 19    | 1.229   | 39.51   |
| 20    | 2.249   | 40.978  |
| 21    | 0.534   | 12.863  |
| 22    |         | 119.398 |
| 24    | 7.008   | 141.74  |
| 25    |         | 129.54  |
| 26    |         | 111.743 |
| 27    |         | 147.054 |
| 28    |         | 183.258 |
| 29    |         | 104.898 |
| 30    |         | 167.931 |
| 32    | 1.74    | 8.288   |

13C Shifts extracted from HSQC and HMBC

<sup>1</sup>H-NMR of Kendomycin in DMSO-d<sub>6</sub> with 15% D<sub>2</sub>O

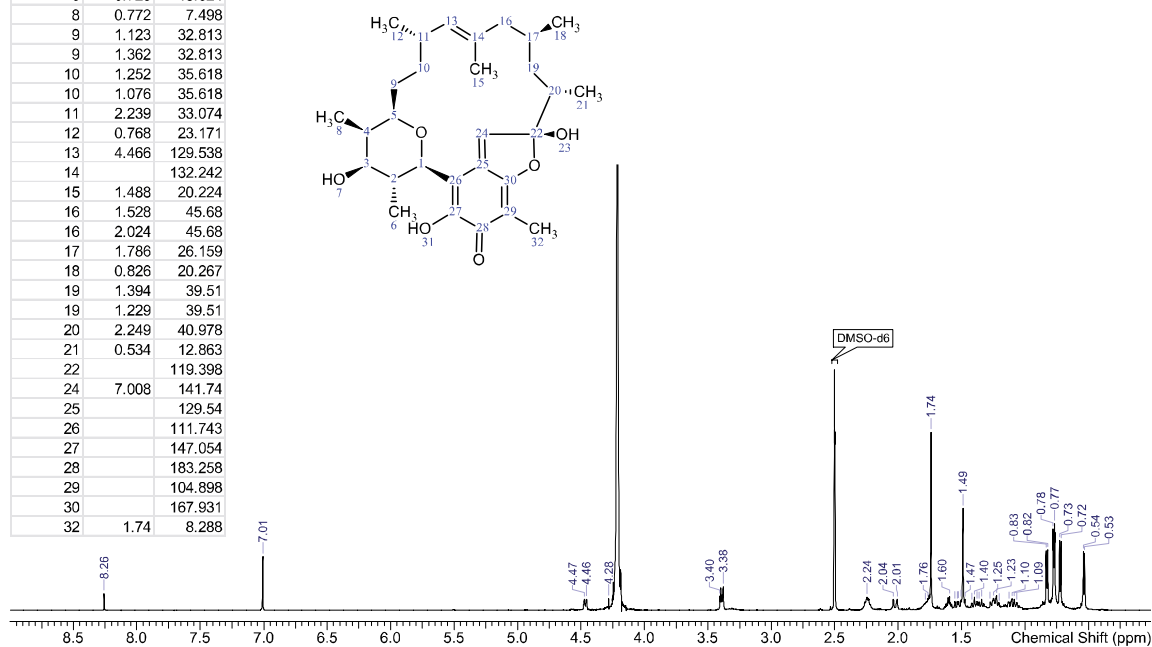

## HSQC of kendomycin

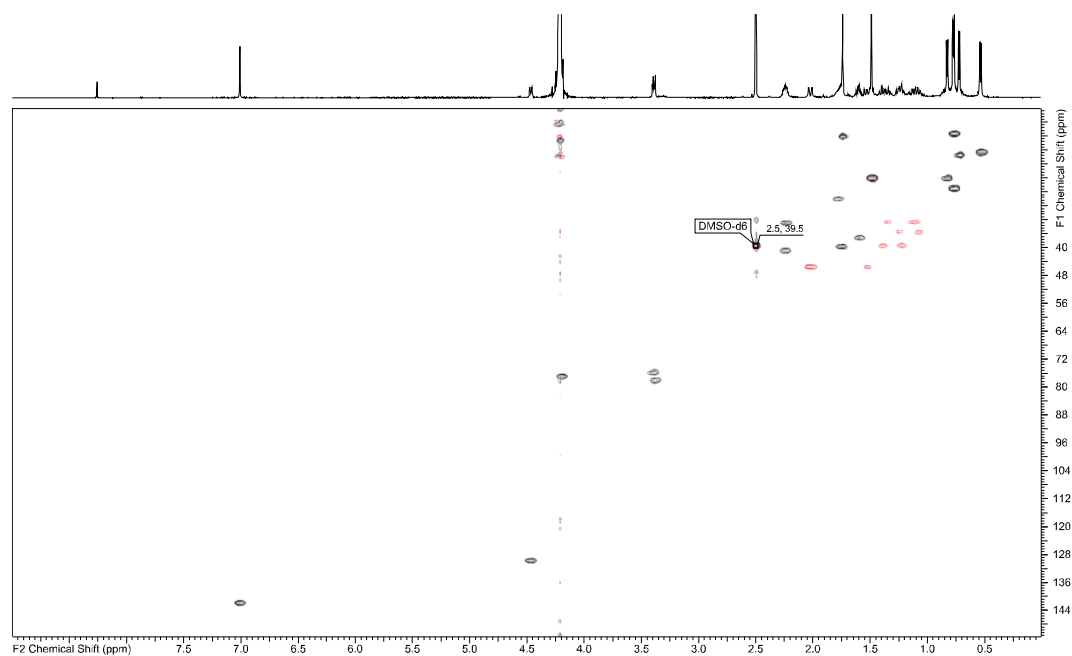

**Figure S4**

NMR spectra of Kendomycin with increasing concentrations of  $\text{FeSO}_4$

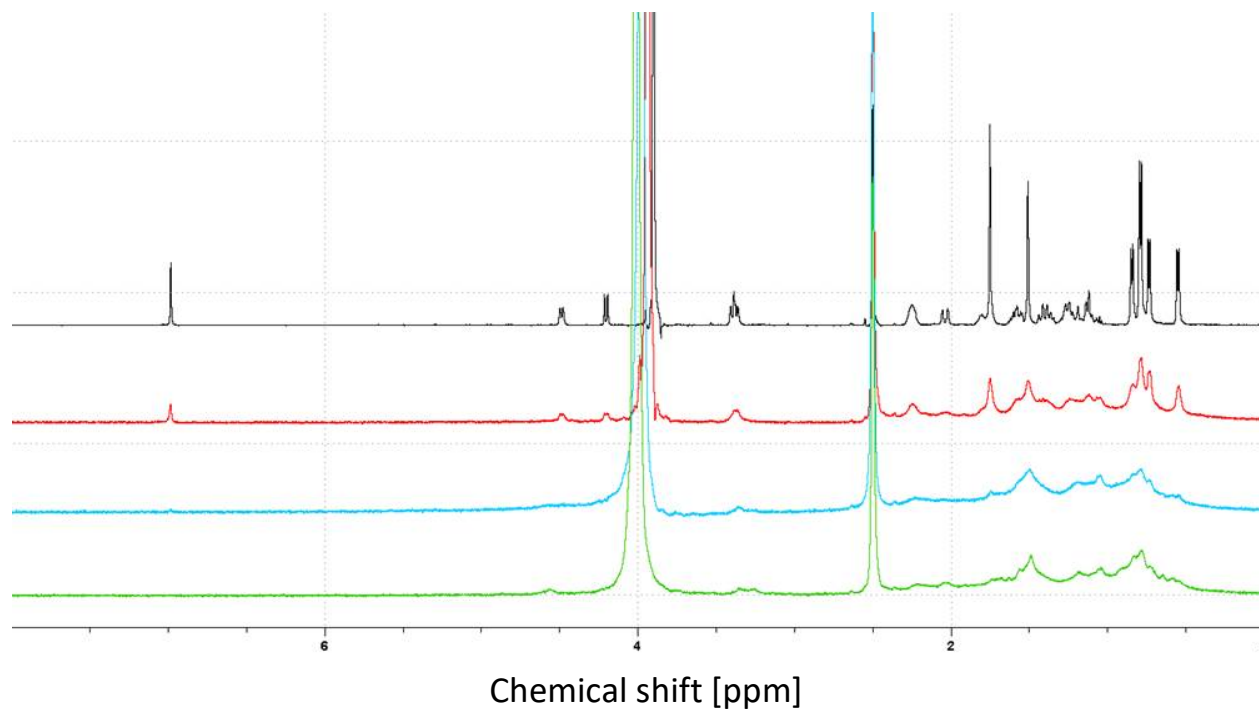

$^1\text{H}$  NMR spectra of 4 mM kendomycin with increasing concentrations of  $\text{FeSO}_4$ ; 0.00 eq (black), 0.33 eq (red), 0.66 eq (blue) and 1.00 equivalent (green). Disappearance of the H24 signal between 0.33 and 0.66 equivalents indicates the formation of a 1:2 Fe(II) : kendomycin complex.

Figure S4

BS17004214795QE #592-601 RT: 6.00-6.07 AV: 5 NL: 2.79E7  
T: FTMS + p ESI Full lock ms [133.4000-2000.0000]

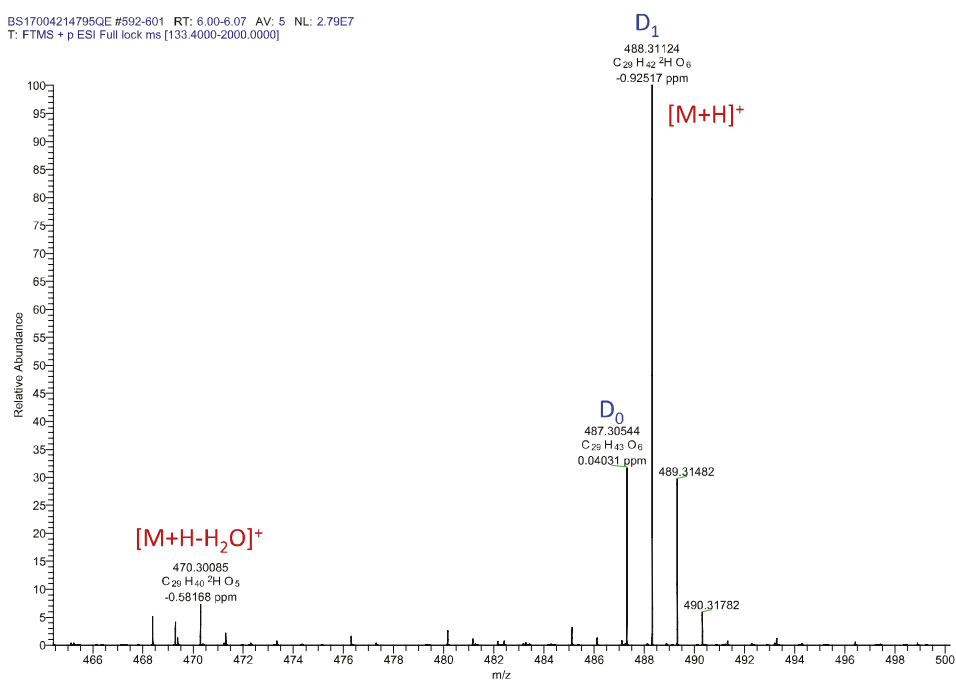

## Table S1

Summary of SNP analysis of 6 kandomycin resistant HCT116 mutant cell lines

| Gene name | Gene description                                       |
|-----------|--------------------------------------------------------|
| ALPK3     | alpha kinase 3                                         |
| CCM2      | CCM2 scaffolding protein                               |
| CROCC     | rootletin, ciliary rootlet coiled-coil                 |
| DCLRE1C   | DNA cross-link repair 1C                               |
| GTF2IRD1  | GTF2I repeat domain containing 1 protein               |
| HSP90AA1  | heat shock protein 90 alpha family class A member 1    |
| IRF3      | interferon regulatory factor 3                         |
| KANK3     | KN motif and ankyrin repeat                            |
| MAP4K4    | mitogen-activated protein kinase kinase kinase 4       |
| NUMBL     | NUMB like, endocytic adaptor protein                   |
| POLG      | DNA polymerase gamma, catalytic subunit                |
| RBMX      | RNA binding motif protein, X-linked                    |
| TFAP4     | transcription factor AP-4                              |
| TM7SF2    | transmembrane 7 superfamily member 2                   |
| TXNRD3    | thioredoxin reductase 3                                |
| UQCRC1    | Rieske Fe-S protein                                    |
| WSCR27    | Williams-Beuren syndrome chromosomal region 27 protein |
| ZBBX      | Zinc finger B-box domain-containing protein 1          |
